# Supplementary material for: Mapping the Spatiotemporal Dynamics of Cropland Abandonment and Recultivation across the Yangtze River Basin
Source: MDPI journal article supplement (doi:10.3390/rs16061052), 2024-03-15
Supplement: s1 [file s1]

## SUPPLEMENTARY MATERIALS

### Supplementary Materials S1. Land use/cover data

#### Supplementary Materials S1.1. Classification classes

We applied our cropland abandonment mapping approach based on the land cover changes. In accordance with the GlobeLand30 classification scheme (<http://www.globallandcover.com/>, accessed 01 Nov 2022), we define 'Cropland' as an area for planting crops, such as paddy fields, irrigated drylands, vegetable fields and other crops with economic significance (e.g., orchard, forage). Our definition excludes non-tilled croplands, but given the prevalence of tilling, this omission should be minimal [1]). Our scheme defines 'Grassland' as perennial and steppe grasslands unused agriculturally. 'Forest' covers various forest types, riparian vegetation, and protective tree lines. Other classes include shrubs, bareland, impervious surfaces, wetlands, and water (Table S1).

**Table S1.** Descriptions of land use / land cover classes used in our time-series maps.

| Code | Class     | Descriptions                                                                                                                                                                                                           |
|------|-----------|------------------------------------------------------------------------------------------------------------------------------------------------------------------------------------------------------------------------|
| 1    | Cropland  | Includes cultivated crops, described as areas used for the production of annual crops, such as corn, rice, soybeans, vegetables, and tobacco. This class also includes all actively tilled land and grass for grazing. |
| 2    | Grassland | Land covered by perennial natural herbaceous vegetation with a cover greater than 10%, including grasslands, meadows, savannas, desert grasslands.                                                                     |
| 3    | Forest    | Land covered by trees with more than 30% canopy cover,                                                                                                                                                                 |

---

|   |                    |                                                                                                                                                                                                                                                                                                                                                                                                                                                                                                                                                              |
|---|--------------------|--------------------------------------------------------------------------------------------------------------------------------------------------------------------------------------------------------------------------------------------------------------------------------------------------------------------------------------------------------------------------------------------------------------------------------------------------------------------------------------------------------------------------------------------------------------|
|   |                    | including deciduous broadleaf forest, evergreen broadleaf forest, deciduous coniferous forest, evergreen coniferous forest, mixed forest, and open forest land with a canopy cover of 10-30%.                                                                                                                                                                                                                                                                                                                                                                |
| 4 | Shrubs             | Land with shrub cover and more than 30% scrub cover, including mountain scrub, deciduous and evergreen scrub, and desert scrub with more than 10% cover in desert areas.                                                                                                                                                                                                                                                                                                                                                                                     |
| 5 | Bareland           | Natural cover land with less than 10% vegetation cover, including desert, sandy land, gravel land, bare rock, saline land.                                                                                                                                                                                                                                                                                                                                                                                                                                   |
| 6 | Impervious surface | Includes developed open spaces with a mixture of some constructed materials, but mostly vegetation in the form of lawn grasses such as large-lot single-family housing units, parks, golf courses, and vegetation planted in developed settings for recreation, erosion control, or aesthetic purposes. Also included are lands of low, medium, and high intensity development with a mixture of constructed materials and vegetation, such as single-family housing units, multifamily housing units, and areas of retail, commercial, and industrial uses. |
| 7 | Wetland            | Includes woody wetlands and herbaceous wetlands – Areas where forest or shrub land vegetation accounts for greater                                                                                                                                                                                                                                                                                                                                                                                                                                           |

---

---

|   |       |                                                                                 |
|---|-------|---------------------------------------------------------------------------------|
|   |       | than 20% of vegetative cover and the soil or substrate is                       |
|   |       | periodically saturated or covered with water. This class also                   |
|   |       | includes areas where perennial herbaceous vegetation                            |
|   |       | accounts for greater than 80% of vegetative cover and the soil                  |
|   |       | or substrate is periodically saturated or covered with water.                   |
| 8 | Water | Land area covered by open water, including rivers, lakes,<br>reservoirs, ponds. |

---

### **Supplementary Materials S1.2. The number of training data and validation data**

Yang and Huang [2] utilized 335,709 Landsat images on the GEE platform to classify land cover [2]. Their method, based on random forest algorithms, generated a continuous map of land-cover across China from 1990 to 2019, boasting a 30 m spatial resolution. This dataset captures various landscapes: cropland, woodland, shrub, grassland, bare land, impervious surfaces, water bodies, snow/ice, and wetlands. They further enhanced the temporal and spatial consistency of the China Land Cover Dataset (CLCD-30m) using a novel post-processing method that combined spatiotemporal filtering with logical reasoning, achieving a classification accuracy of approximately 79.31%. Another study assessed the CLCD's relevance to agriculture [3]. They validated the accuracy of the dataset's representation of 30 m cropland in China against six other datasets using 30,000 collected samples. Their findings indicated that the CLCD offers significant precision.

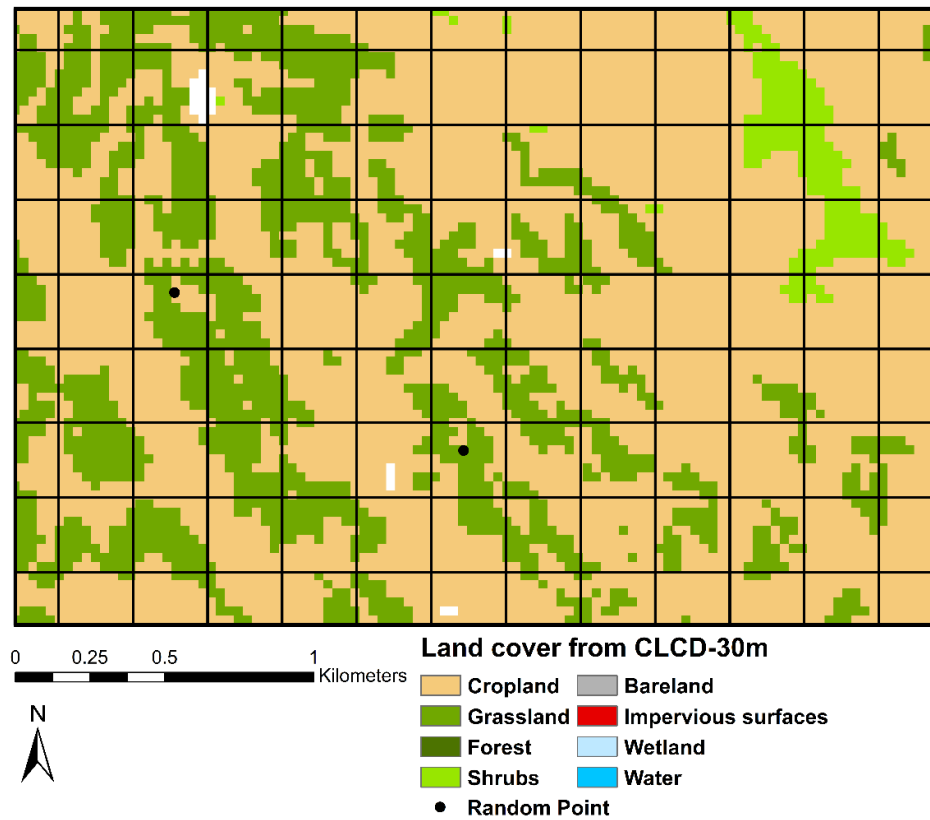

**Figure S1.** Sample point correction based on CLCD-30m. The black grid in the figure has a resolution of 250m, which reflects the resolution of the MODIS. The random points come from samples that we need to manually correct.

**Table S2.** The number of training samples for each land cover

Abbreviation: CL = Cropland; GRA = Grassland; FORE = Forest; SHR = Shrubs; BAR=Bareland;

IM = Impervious surface; WET = Wetland; WAT = Water

| Year | CL   | GRA  | FORE | SHR | BAR | IM  | WET | WAT |
|------|------|------|------|-----|-----|-----|-----|-----|
| 2000 | 3027 | 905  | 4098 | 20  | 16  | 139 | 23  | 201 |
| 2001 | 2958 | 1092 | 4349 | 21  | 21  | 195 | 15  | 228 |
| 2002 | 2818 | 945  | 4183 | 39  | 19  | 94  | 13  | 281 |
| 2003 | 2866 | 1157 | 3703 | 35  | 17  | 119 | 41  | 241 |

---

|      |      |      |      |    |    |     |    |     |
|------|------|------|------|----|----|-----|----|-----|
| 2004 | 2861 | 1125 | 4151 | 29 | 25 | 120 | 32 | 304 |
| 2005 | 2863 | 1292 | 4178 | 39 | 20 | 114 | 11 | 204 |
| 2006 | 2834 | 1237 | 4999 | 34 | 16 | 129 | 56 | 234 |
| 2007 | 2824 | 1131 | 4365 | 21 | 27 | 121 | 46 | 221 |
| 2008 | 2627 | 992  | 4798 | 22 | 18 | 129 | 31 | 280 |
| 2009 | 2707 | 962  | 4654 | 23 | 29 | 60  | 36 | 240 |
| 2010 | 2537 | 924  | 3609 | 43 | 11 | 95  | 17 | 247 |
| 2011 | 3131 | 1260 | 4307 | 23 | 14 | 92  | 42 | 286 |
| 2012 | 2712 | 1006 | 3580 | 26 | 13 | 100 | 23 | 286 |
| 2013 | 2752 | 947  | 3864 | 26 | 14 | 100 | 26 | 286 |
| 2014 | 2767 | 987  | 3823 | 22 | 14 | 113 | 25 | 178 |
| 2015 | 2730 | 942  | 3768 | 20 | 12 | 142 | 29 | 286 |
| 2016 | 2844 | 1042 | 3786 | 20 | 18 | 127 | 14 | 286 |
| 2017 | 2811 | 1026 | 3998 | 15 | 17 | 143 | 20 | 286 |
| 2018 | 2907 | 986  | 4501 | 18 | 15 | 264 | 25 | 286 |
| 2019 | 2848 | 932  | 4654 | 18 | 17 | 262 | 26 | 201 |
| 2020 | 2649 | 985  | 4586 | 37 | 24 | 248 | 29 | 295 |

---

**Table S3.** The number of validation samples for each land cover

Abbreviation: CL = Cropland; GRA = Grassland; FORE = Forest; SHR = Shrubs; BAR=Bareland;

IM = Impervious surface; WET = Wetland; WAT = Water

| Year | CL   | GRA | FORE | SHR | BAR | IM | WET | WAT |
|------|------|-----|------|-----|-----|----|-----|-----|
| 2000 | 1389 | 381 | 1717 | 12  | 6   | 27 | 8   | 57  |
| 2001 | 1240 | 548 | 1838 | 14  | 8   | 24 | 4   | 60  |
| 2002 | 1280 | 411 | 1797 | 15  | 5   | 23 | 3   | 70  |
| 2003 | 1343 | 462 | 1685 | 11  | 4   | 30 | 10  | 60  |
| 2004 | 1318 | 395 | 1585 | 18  | 9   | 32 | 11  | 69  |
| 2005 | 994  | 420 | 2032 | 12  | 9   | 32 | 4   | 69  |
| 2006 | 1013 | 408 | 1977 | 12  | 7   | 24 | 20  | 59  |
| 2007 | 1076 | 377 | 2121 | 14  | 12  | 28 | 15  | 58  |
| 2008 | 977  | 330 | 1934 | 7   | 6   | 22 | 10  | 73  |
| 2009 | 903  | 321 | 1887 | 7   | 9   | 20 | 12  | 41  |
| 2010 | 937  | 271 | 1780 | 14  | 4   | 32 | 6   | 44  |
| 2011 | 891  | 532 | 1958 | 7   | 5   | 31 | 4   | 54  |
| 2012 | 908  | 267 | 1830 | 8   | 4   | 27 | 8   | 46  |
| 2013 | 1001 | 316 | 1589 | 8   | 5   | 38 | 8   | 50  |
| 2014 | 921  | 411 | 1675 | 15  | 5   | 23 | 6   | 70  |
| 2015 | 931  | 314 | 1856 | 7   | 4   | 47 | 10  | 51  |
| 2016 | 927  | 347 | 1762 | 6   | 6   | 43 | 5   | 49  |
| 2017 | 937  | 343 | 1933 | 5   | 6   | 47 | 6   | 59  |
| 2018 | 816  | 328 | 2036 | 6   | 5   | 88 | 8   | 66  |

|      |     |     |      |    |   |    |   |    |
|------|-----|-----|------|----|---|----|---|----|
| 2019 | 884 | 311 | 2051 | 6  | 6 | 87 | 9 | 67 |
| 2020 | 882 | 328 | 1930 | 12 | 8 | 83 | 9 | 98 |

## **Supplementary Materials S2. Spatiotemporal dynamics of cropland abandonment and recultivation**

### **Supplementary Materials S2.1. The effect of varying of abandonment definitions**

Given the ecological pressures and food security issues within the study area, our research incorporated a two-year threshold to account for these aspects. Defining abandonment over a relatively short period could inadvertently lead to an overestimation of cropland abandonment, as fallow cycles of one year could be mistakenly classified as abandonment periods. In certain contexts, short-term abandonment might be more accurately interpreted as cyclical fallow periods, rather than true abandonment, in order to accurately represent the complexities of agricultural practices [4].

Moreover, our study delineates cropland abandonment as the transformation of cropland into natural vegetation types like grassland, shrubs, and bareland. It is unlikely that natural vegetation succession would develop into a tree-dominated landscape throughout the entire Yangtze River Basin within two years. The growth of naturally regenerating forests is a lengthy process that often spans many years, and the natural vegetation succession on abandoned land is influenced by a range of factors [5,6].

Our abandonment threshold also affected the proportion of abandoned croplands that were recultivated by the end of the study period. It is reasonable to infer a smaller recultivation area when applying a longer abandonment threshold.

## **Supplementary Materials S2.2. Comparing approaches to estimate cropland abandonment: time series imageries and two-timepoint imageries**

Some studies estimate cropland abandonment merely comparing two cropland maps, identifying areas where land cover is classified as "cultivated" in one year but not in a subsequent year (for instance, comparing maps from 1992 and 2015)[7]. Such a method may overestimate abandonment by including short-term fallow periods and may even fail to account for subsequent recultivation. To illustrate this issue and examine the impact of using this simplified method versus our comprehensive annual time series approach, we estimated cropland abandonment by only identifying areas classified as "cropland" in 2000, and subsequently reclassified as either "woody vegetation (i.e., forest, shrubs)" or "herbaceous vegetation (i.e., grassland)" in 2020, excluding "non-vegetation" categories.

When we applied this two-timepoint method, we identified a total of only  $19307 \times 10^3$  ha as "abandoned," which is a 10% underestimation as compared to the total  $21490 \times 10^3$  ha of "abandonment" estimated for 2020 using our annual time series. This not only yielded differing area estimates but also pinpointed geographically distinct areas of abandonment. This underlines the importance of using a comprehensive and temporally rich methodology, such as an annual time series, for a more precise estimation of cropland abandonment.



### **Supplementary Materials S2.3. Flowchart in classifying cropland abandonment and recultivation**

In our time series, we solely incorporated the progression from verifiable cropland to natural vegetation within our time series. Pixels that consistently displayed classifications of cropland or non-cropland (i.e., herbaceous or woody vegetation) throughout the time series were excluded. Since we lacked sufficient information about the previous cultivation status of non-cultivated land, determining the initial status in our time series was not feasible. Therefore, if pixels initially transitioned from non-cultivated into cultivated status and subsequently reverted to natural vegetation, we only considered the latter transformation of these pixels as abandonment (Figure 2).

To illustrate this, we considered the following time series, which represents twenty years beginning at the start of our time series (e.g. where 1 represents cropland and 2 represents grassland):

This represents five years of non-cropland to start the time series, followed by three years of cropland cultivation, followed by three years of non-cropland. Though this pixel experienced two periods of non-cropland classification of two or more years (from 2000 through 2004, and from 2008 through 2010), we only count the second, three-year period (2007 through 2009) as its first cropland abandonment, because it clearly followed cropland classification. As highlighted in the main text, pixels that transitioned from cropland to the non-vegetation land cover class (i.e. impervious surfaces, wetland, water) were not categorized as "abandonment." Consequently, we excluded all non-vegetation land cover pixels from our analysis, counting for less than 3% of the total area across all sites.

#### Supplementary Materials S2.4. Cumulative cropland abandonment area

Our analysis reveals that the majority of abandoned croplands did not remain idle. By 2020, about 74% of the total abandoned cropland area, corresponding to  $15857 \times 10^3$  ha, had been recultivated. Additionally, about  $1294 \times 10^3$  ha of the initially abandoned croplands were converted into impervious surfaces. These transformations resulted in a significant reduction in the total area of abandoned croplands. Specifically, by the end of the study period in 2020, the total area of land that remained abandoned was  $4339 \times 10^3$  ha. This figure represents a decrease of 51% compared to the total area that had been abandoned at least once during the time series.

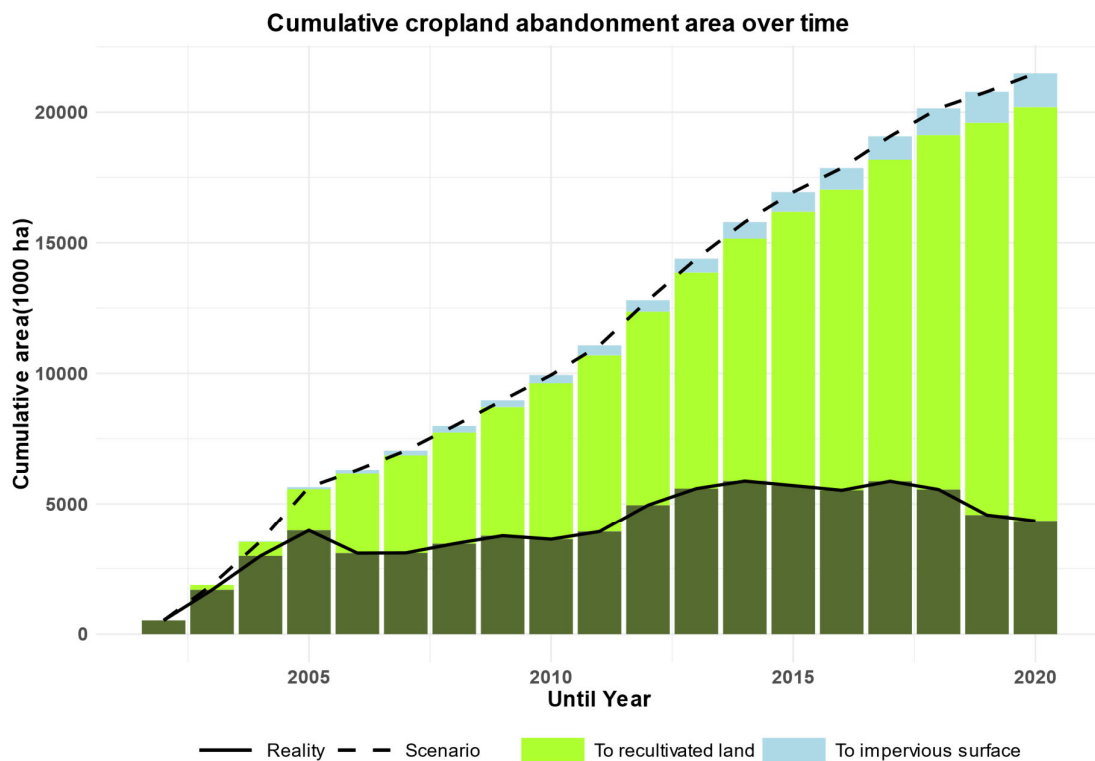

**Figure S2.** Cumulative cropland abandonment area. The solid black line represents the total cumulative reality area of abandoned cropland, and the dashed black line represents the cumulative scenario area of abandoned cropland, assuming a scenario without recultivation.

### Supplementary Materials S2.5. Time-series analysis of cropland abandonment and recultivation

Cropland abandonment area trend: The regression analysis indicates a negative slope ( $<0$ ), suggesting a decreasing trend in the cropland abandonment area over the years. However, the p-value for this trend is 0.48, which means that the observed trend is not statistically significant (Figure S3(a)).

Cropland abandonment rate trend: the trend in the cropland abandonment rate also shows a negative slope ( $<0$ ) with a p-value  $> 0.05$ , indicating that this decrease over time is neither statistically significant (Figure S3(b)).

Recultivation area trend: the trend in the recultivation area shows a positive slope  $> 0$ , with a p-value  $< 0.05$ , indicating a significant increase over time (Figure S4).

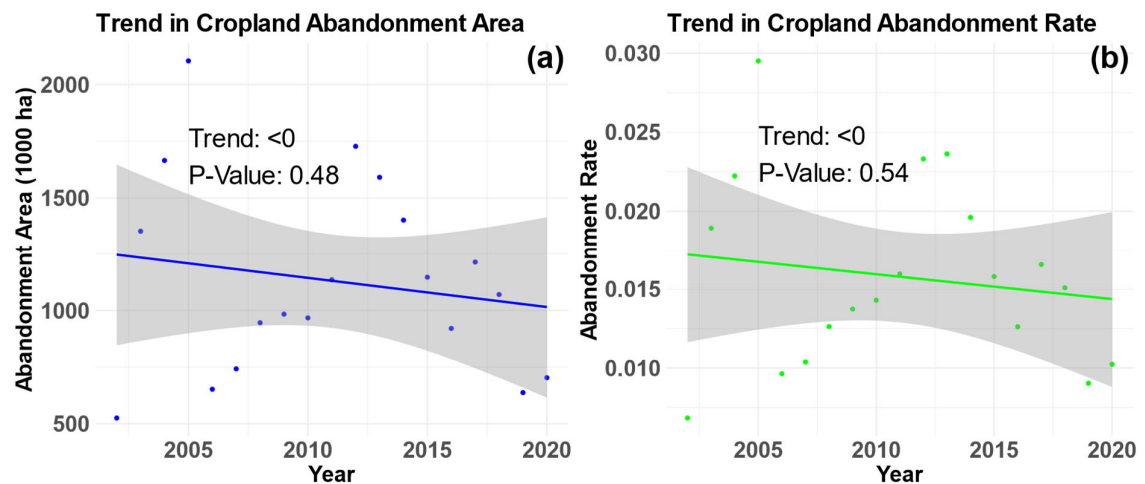

**Figure S3.** Trends in (a) cropland abandonment area and (b) rate (2002-2020). The blue and green lines respectively depict the trends in cropland abandonment area and rate over time. The gray shaded areas represent the 95% confidence intervals.

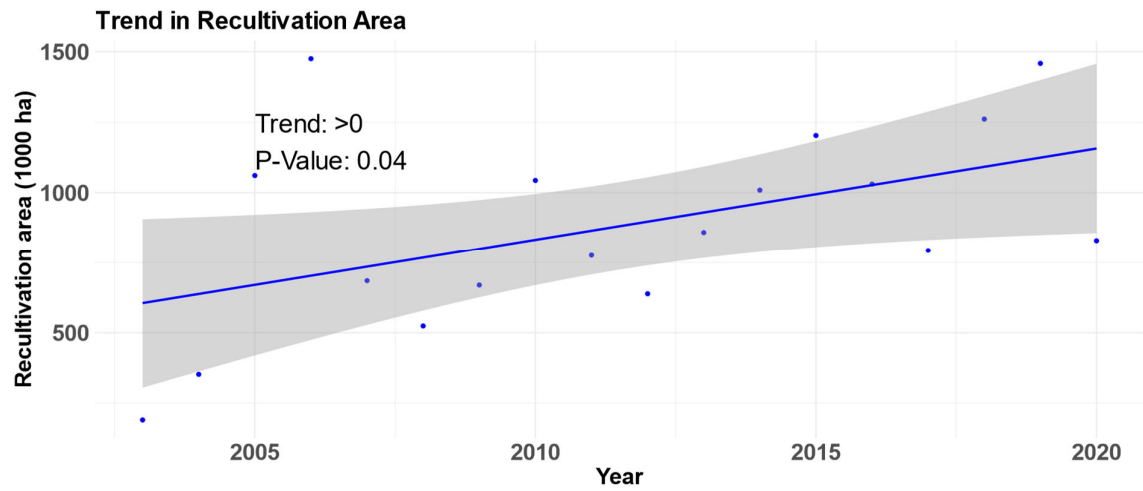

**Figure S4.** Trends in recultivation area (2003-2020). The blue line depicts the trends in recultivation area over time. The gray shaded areas represent the 95% confidence intervals.

## References:

1. Kassam, A.; Friedrich, T.; Derpsch, R. Global spread of Conservation Agriculture. *Int. J. Environ. Stud.* **2018**, *76*, 29–51, doi:10.1080/00207233.2018.1494927.
2. Yang, J.; Huang, X. The 30 m annual land cover dataset and its dynamics in China from 1990 to 2019. *Earth System Science Data* **2021**, *13*, 3907–3925, doi:10.5194/essd-13-3907-2021.
3. Zhang, H.; Zhang, J.; Song, J. Analysis of the threshold effect of agricultural industrial agglomeration and industrial structure upgrading on sustainable agricultural development in China. *Journal of Cleaner Production* **2022**, *341*, 130818, doi:10.1016/j.jclepro.2022.130818.
4. Munroe, D.K.; van Berkel, D.B.; Verburg, P.H.; Olson, J.L. Alternative trajectories of land abandonment: causes, consequences and research challenges. *Current Opinion in Environmental Sustainability* **2013**, *5*, 471–476, doi:10.1016/j.cosust.2013.06.010.
5. Poorter, L.; Bongers, F.; Aide, T.M.; Almeyda Zambrano, A.M.; Balvanera, P.; Becknell, J.M.; Boukili, V.; Brancalion, P.H.; Broadbent, E.N.; Chazdon, R.L. Biomass resilience of Neotropical secondary forests. *Nature* **2016**, *530*, 211–214, doi:10.1038/nature16512.
6. Prach, K.; Walker, L.R. Four opportunities for studies of ecological succession. *Trends in Ecology & Evolution* **2011**, *26*, 119–123, doi:10.1016/j.tree.2010.12.007.
7. Næss, J.S.; Cavalett, O.; Cherubini, F. The land–energy–water nexus of global bioenergy potentials from abandoned cropland. *Nature Sustainability* **2021**, *4*, 525–536, doi:10.1038/s41893-020-00680-5.

**Disclaimer/Publisher's Note:** The statements, opinions and data contained in all publications are solely those of the individual author(s) and contributor(s) and not of MDPI and/or the editor(s). MDPI and/or the editor(s) disclaim responsibility for any injury to people or property resulting from any ideas, methods, instructions or products referred to in the content.
